# Supplementary material for: Immobilization of Lathyrus cicera Amine Oxidase on Magnetic Microparticles for Biocatalytic Applications
Source: MDPI journal article supplement (doi:10.3390/ijms23126529), 2022-06-10
Supplement: s1 [file s1]

## SUPPLEMENTARY MATERIAL

### Immobilization of *Lathyrus cicera* amine oxidase on magnetic microparticles for biocatalytic applications

Elisa Di Fabio<sup>1</sup>, Antonia Iazzetti<sup>2</sup>, Alessio Incocciati<sup>1</sup>, Valentina Caseli<sup>3</sup>, Giancarlo Fabrizi<sup>2</sup>, Alberto Boffi<sup>1,2</sup>, Alessandra Bonamore<sup>1</sup>, and Alberto Macone<sup>1,\*</sup>

<sup>1</sup> Affiliation 1; Department of Biochemical Sciences "Alessandro Rossi Fanelli", Sapienza University of Rome, Piazzale Aldo Moro 5, 00185 Rome, Italy; elisa.difabio@uniroma1.it; alessio.incocciati@uniroma1.it; alberto.boffi@uniroma1.it; alessandra.bonamore@uniroma1.it; alberto.macone@uniroma1.it

<sup>2</sup> Affiliation 2; Center for Life Nano Science@Sapienza, Istituto Italiano Di Tecnologia, V.le Regina Elena 291, 00161 Rome, Italy; valentina.caseli@iit.it

<sup>3</sup> Affiliation 3; Department of Chemistry and Technology of Drugs, Sapienza University of Rome, Piazzale Aldo Moro 5, 00185, Rome, Italy; giancarlo.fabrizi@uniroma1.it; antonia.iazzetti@uniroma1.it

#### Table of Content

#### LCAO-MMPs ENZYMATIC ACTIVITY

**Figure S1:** Kinetic plots of immobilized LCAO

#### CARACTERIZATION OF COMPOUND 1c

**Figure S2:** Gas chromatogram and EI mass spectrum of **1c**

**Figure S3:** HPLC-DAD analysis of **1c**

**Figure S4:** <sup>1</sup>H, <sup>13</sup>C NMR spectra of **1c**

## LCAO-MMPs ENZYMATIC ACTIVITY

**Figure S1. Kinetic plots** Kinetic plots of immobilized LCAO

All the kinetic parameters for compounds **1a-7a** were obtained from the Michaelis and Menten plots. Initial rates of reaction were determined at different substrate concentrations in the presence of LCAO-MMPs, at 25°C by means of a coupled LCAO-peroxidase spectrophotometric assay. The formation of the colored product was followed at 515 nm for 1 min. Each point is the mean of two experiments.

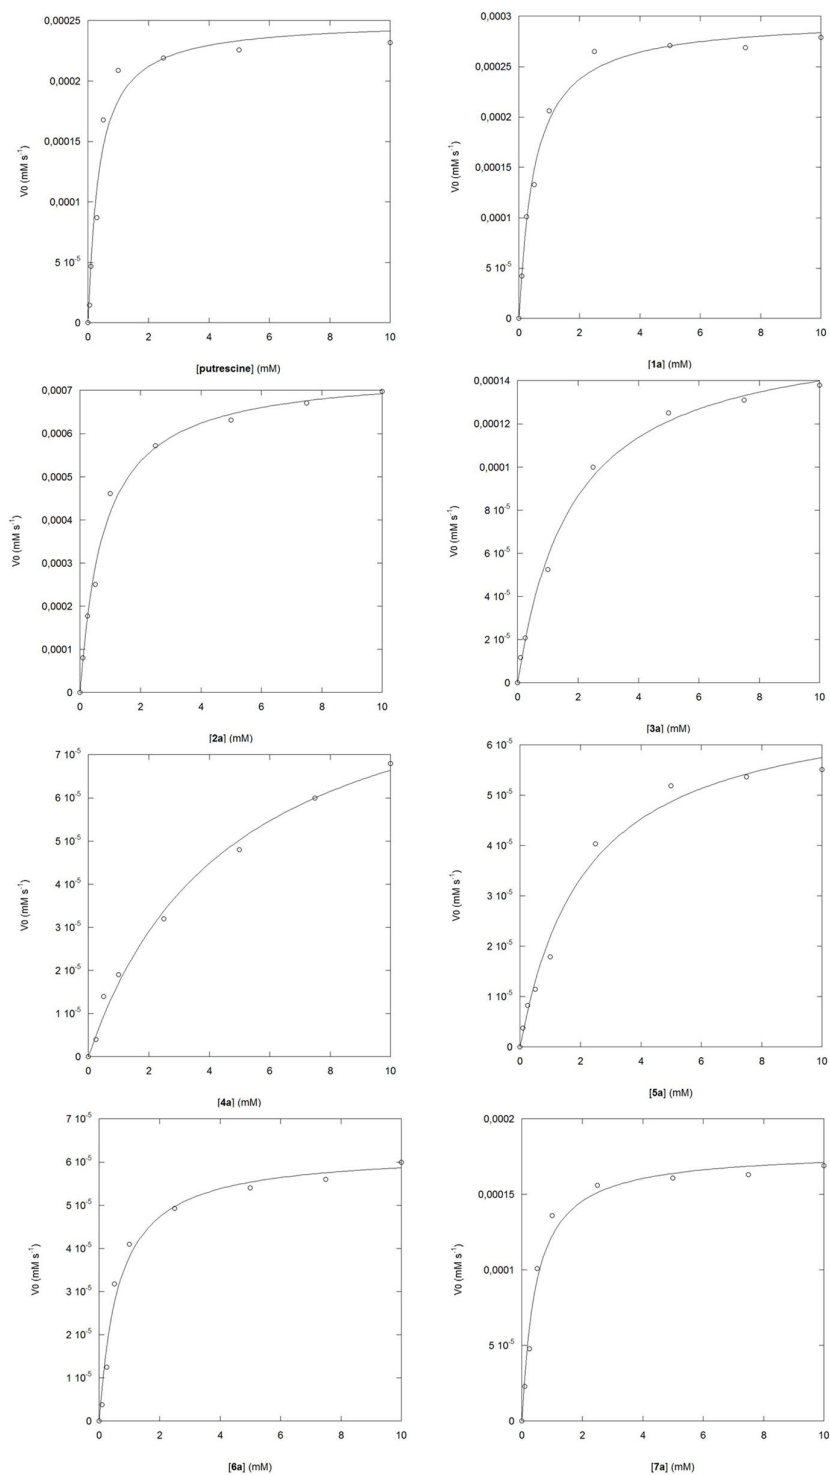

## CARACTERIZATION OF COMPOUND 1c

Figure S2. Gas chromatogram and EI mass

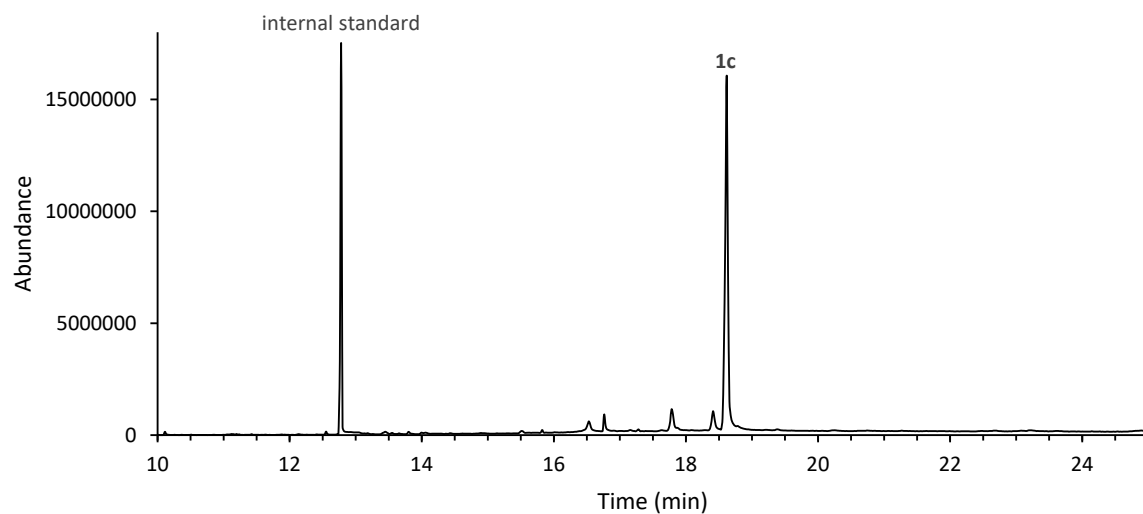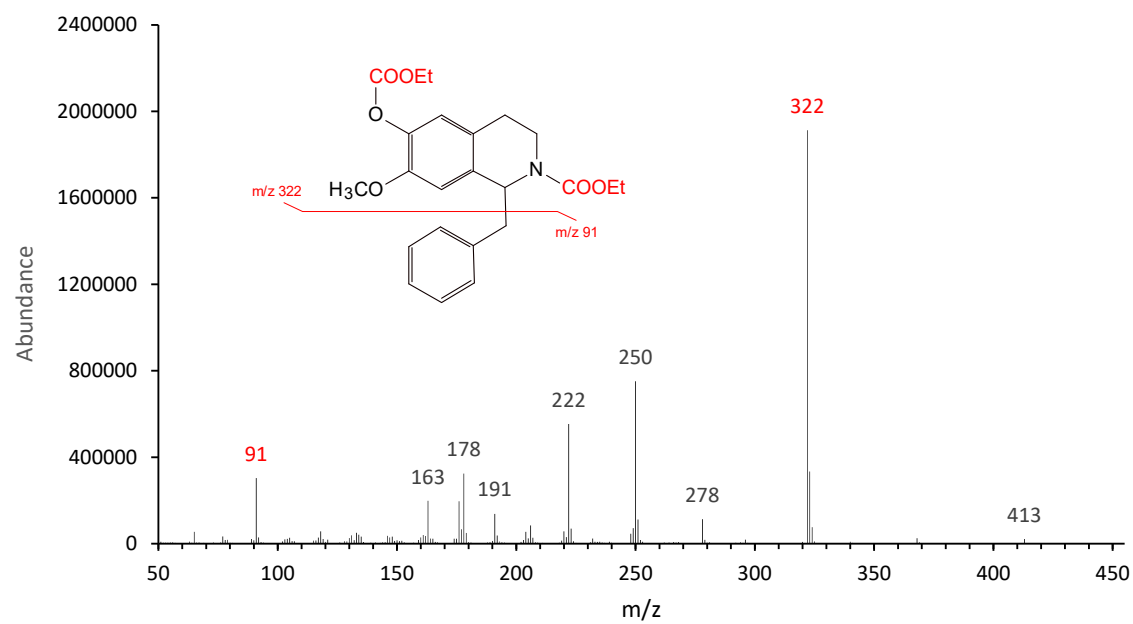

### HPLC and NMR analyses of compound **1c**

$^1\text{H}$  NMR (400.13 MHz), and  $^{13}\text{C}$  NMR (100.6 MHz) were recorded with a Bruker Avance 400 spectrometer, equipped with Nanobay console and Cryoprobe Prodigy probe. Splitting patterns are designed as s (singlet), dd (doublet of doublets), m (multiplet). IR spectra were recorded with a Jasco FT/IR-6800 spectrophotometer. Melting points were determined with a Büchi B-545 apparatus and are uncorrected.

**1c**: known compound;  $^1$  yellow solid; mp: 151- 153 °C; IR (neat): 3305, 3055, 2916, 1604, 1532, 1494, 1334, 1209, 1125, 997  $\text{cm}^{-1}$ ;  $^1\text{H}$  NMR (400.13 MHz) ( $\text{CDCl}_3$ ):  $\delta$  = 7.36 - 7.24(m, 5 H), 6.65 (s, 1 H), 6.59 (s, 1 H), 4.16 (dd,  $J_1$  = 9.4 Hz,  $J_2$  = 4.4 Hz, 2 H), 3.8 (s, 3 H), 3.24- 3.17 (m, 2 H), 2.97 – 2.88 (m, 3 H), 2.77 – 2.65 (m, 2 H);  $^{13}\text{C}$  NMR (100.6 MHz) ( $\text{CDCl}_3$ ):  $\delta$  = 144.8 (C), 144.1 (C), 139.1 (C), 129.9 (C), 129.4 (CH), 128.6 (CH), 128.0 (C), 126.5 (CH), 114.8 (CH), 108.8 (CH), 56.9 (CH), 55.9 ( $\text{CH}_3$ ), 42.9 ( $\text{CH}_2$ ), 40.6 ( $\text{CH}_2$ ), 29.2 ( $\text{CH}_2$ ).

### HPLC- DAD Analysis

The calibration curve was built and used for the quantitation of **1c** in the reaction mixture, using a sample of the same purified compound ( $R^2 = 0.997$ ), as the reference standard.

**Figure S3. HPLC-DAD analysis of compound **1c**.** The measurement was performed at 280 nm: chromatogram overlapping of authentic standard (upper curve) and analyte (lower curve).

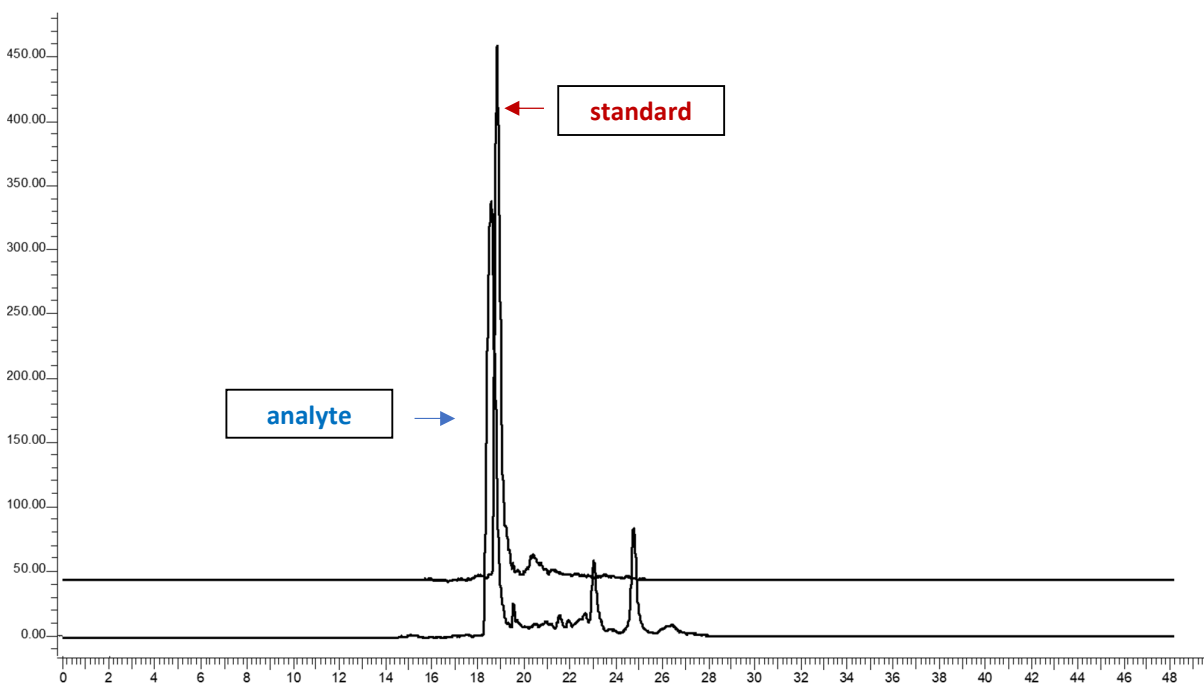

Figure S4:  $^1\text{H}$ ,  $^{13}\text{C}$  NMR spectra of **1c**

$^1\text{H}$  NMR (400.13 MHz),  $\text{CDCl}_3$

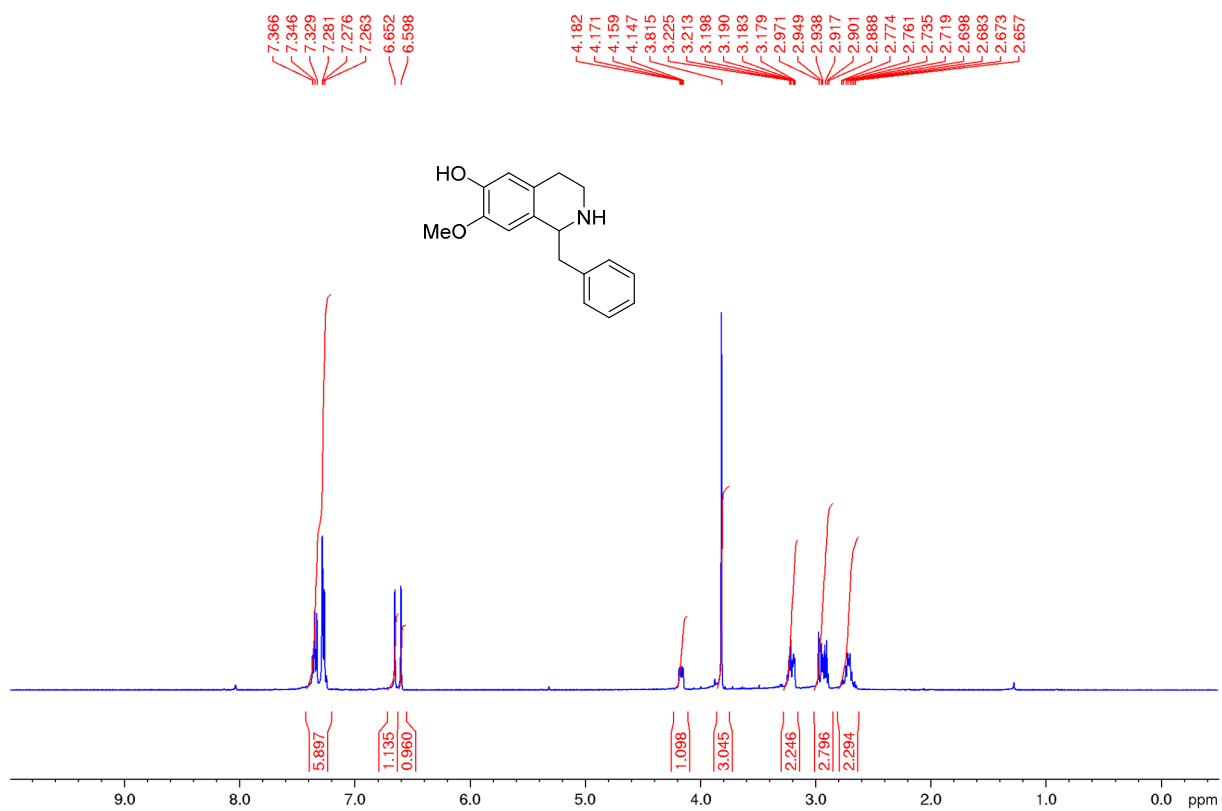

**$^{13}\text{C}$  NMR (100.6 MHz),  $\text{CDCl}_3$  (1c)**

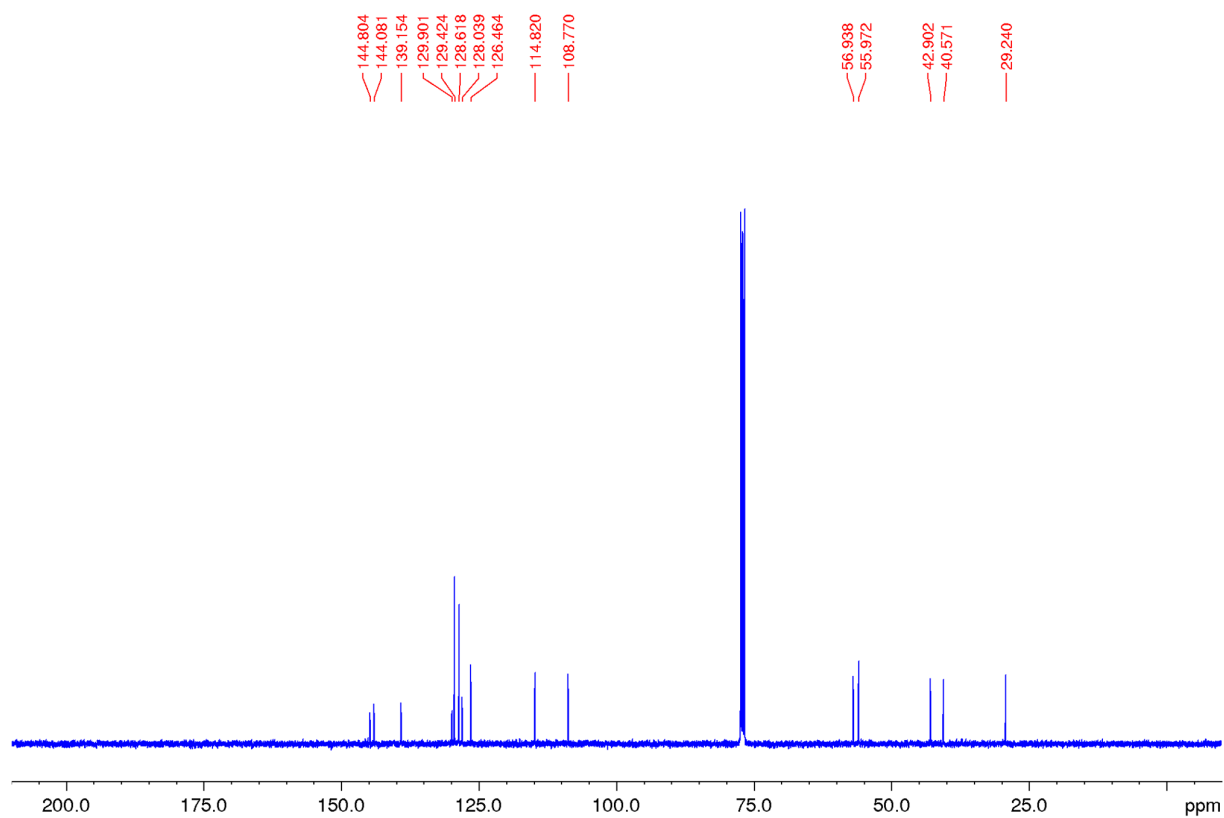

**<sup>13</sup>C NMR - DEPT, CDCl<sub>3</sub> (1c)**

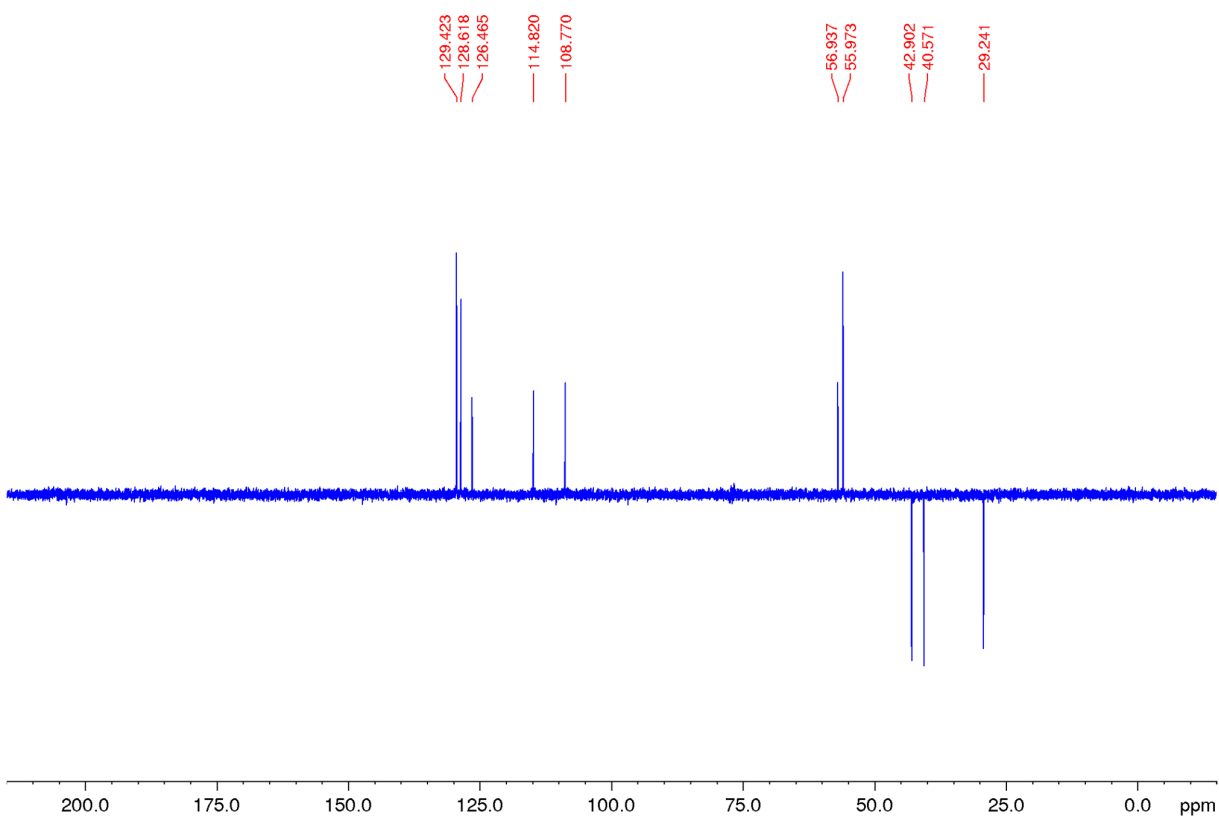

**References**

- <sup>1</sup> Andreu, I.; Cortes, D.; Protais, P.; Cassels, B. K.; Chagraoui, A.; Cabedo, N., Preparation of dopaminergic N-alkyl-benzyltetrahydro-isoquinolines using a 'one-pot' procedure in acid medium. *Bioorganic & Medicinal Chemistry* **2000**, *8*, 889-895.
